# Supplementary material for: Identification of a Novel Inhibitor of TfR1 from Designed and Synthesized Muriceidine A Derivatives
Source: MDPI journal article supplement (doi:10.3390/antiox11050834), 2022-04-25
Supplement: s1 [file s1]

## **Supplementary Material**

### **Identification of a novel inhibitor of TfR1 from designed and synthesized Muriceidine A derivatives**

Yu Wu <sup>1,⊥</sup>, Zongchen Ma <sup>1,⊥</sup>, Xiaoyuan Mai <sup>1</sup>, Xiaoling Liu<sup>1</sup>, Pinglin Li <sup>1</sup>, Xin Qi<sup>1</sup>,  
Guoqiang Li <sup>1,2,\*</sup> and Jing Li <sup>1,2,\*</sup>

<sup>1</sup> Key Laboratory of Marine Drugs, Chinese Ministry of Education, School of Medicine and Pharmacy, Ocean University of China, Qingdao 266003, P. R. China

<sup>2</sup> Laboratory for Marine Drugs and Bioproducts, Open Studio for Druggability Research of Marine Natural Products, Qingdao National Laboratory for Marine Science and Technology, Qingdao 266237, P. R. China.

#### **\*Corresponding Author**

E-mail address: lijing\_ouc@ouc.edu.cn (J. L.) and liguoqiang@ouc.edu.cn (G. L.)

<sup>⊥</sup>These authors contributed equally to this work

$^1\text{H}$ -NMR spectra and  $^{13}\text{C}$ -NMR spectra of compounds **Muriceidine A. 12a-12d** and **16**

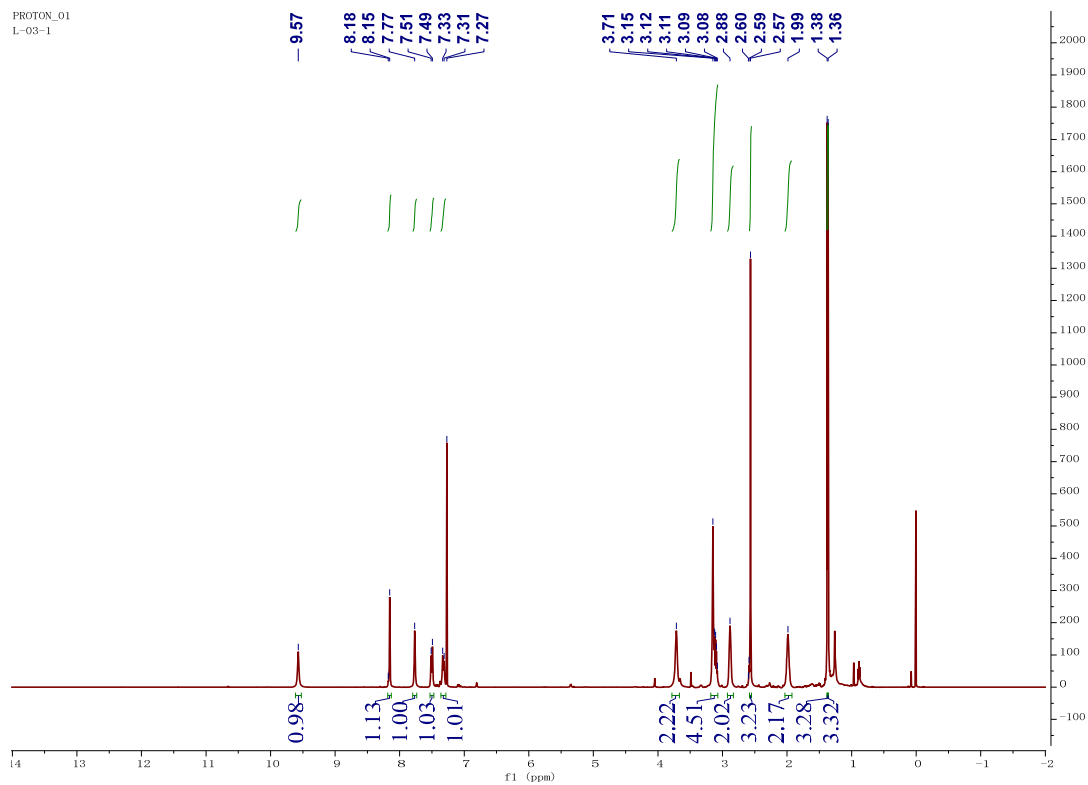

Figure S1: The  $^1\text{H}$ -NMR spectra of **Muriceidine A**

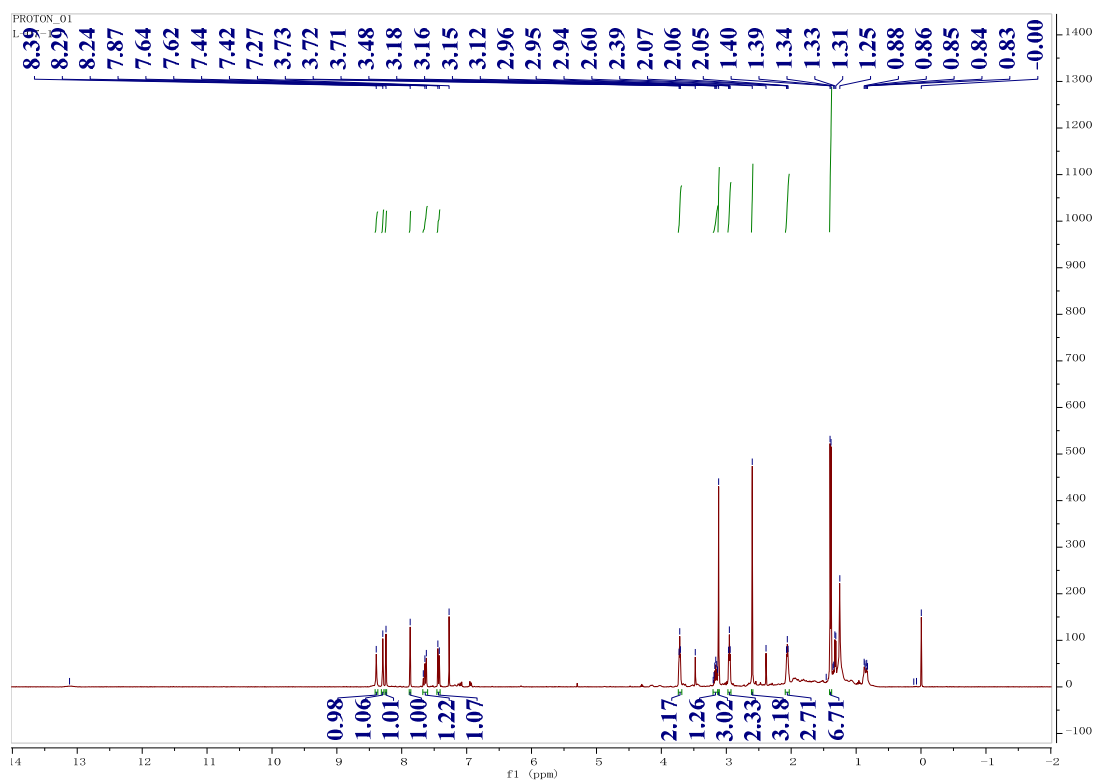

Figure S2: The  $^1\text{H}$ -NMR spectra of **12a**

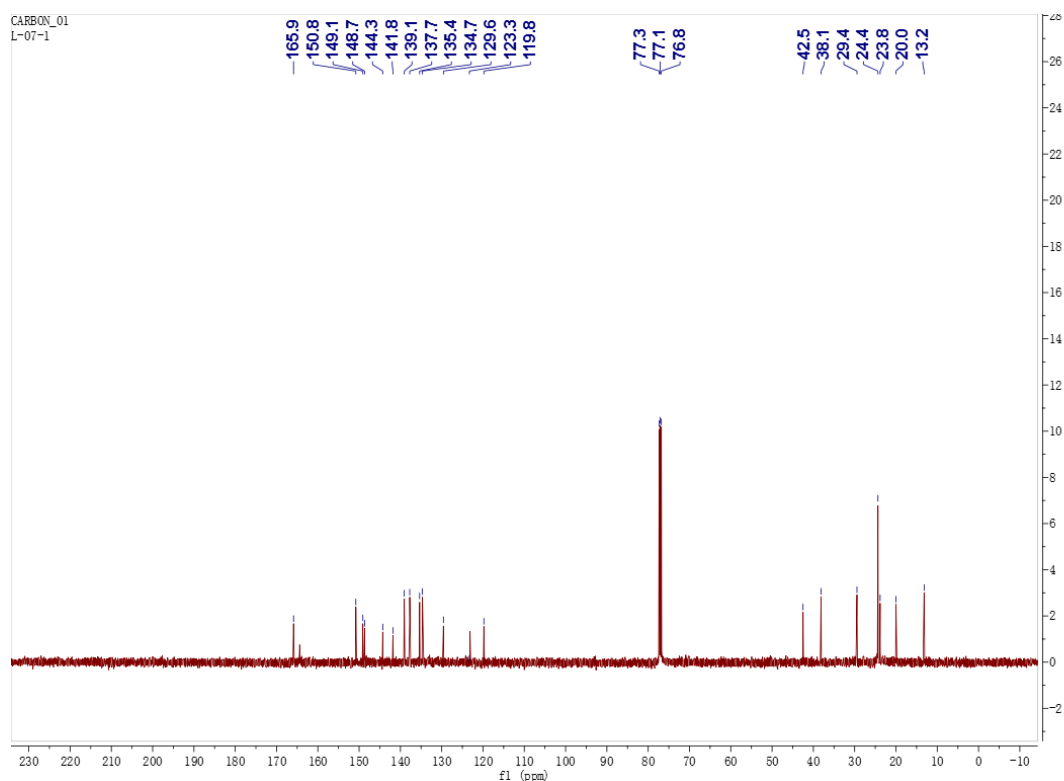

Figure S3: The  $^{13}\text{C}$ -NMR spectra of **12a**

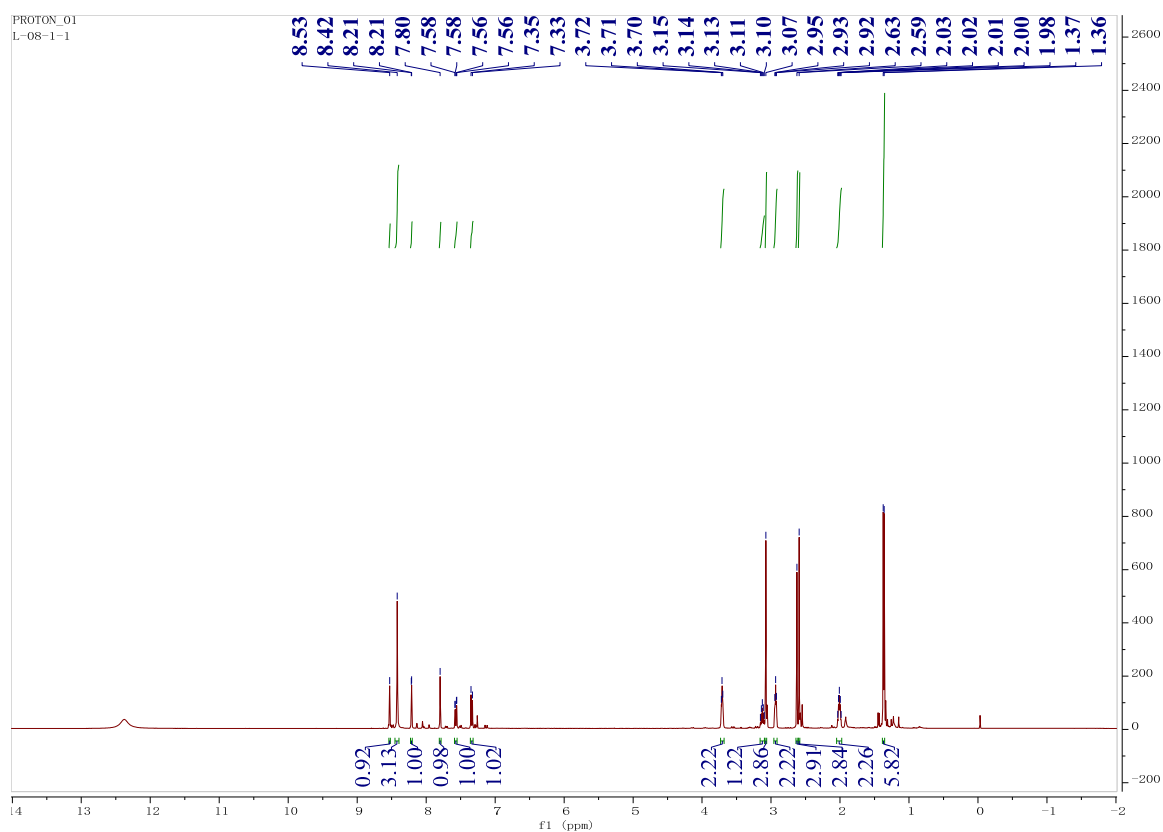

Figure S4: The  $^1\text{H}$ -NMR spectra of **12b**

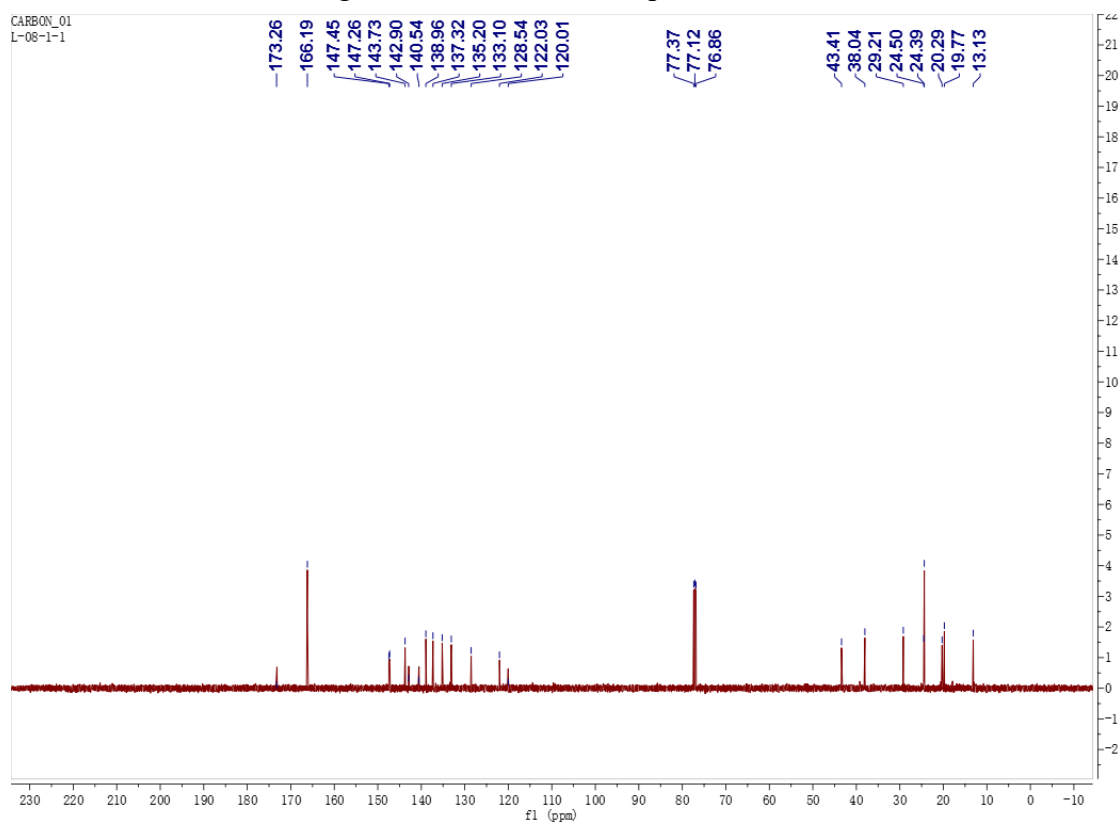

Figure S5: The  $^{13}\text{C}$ -NMR spectra of **12b**

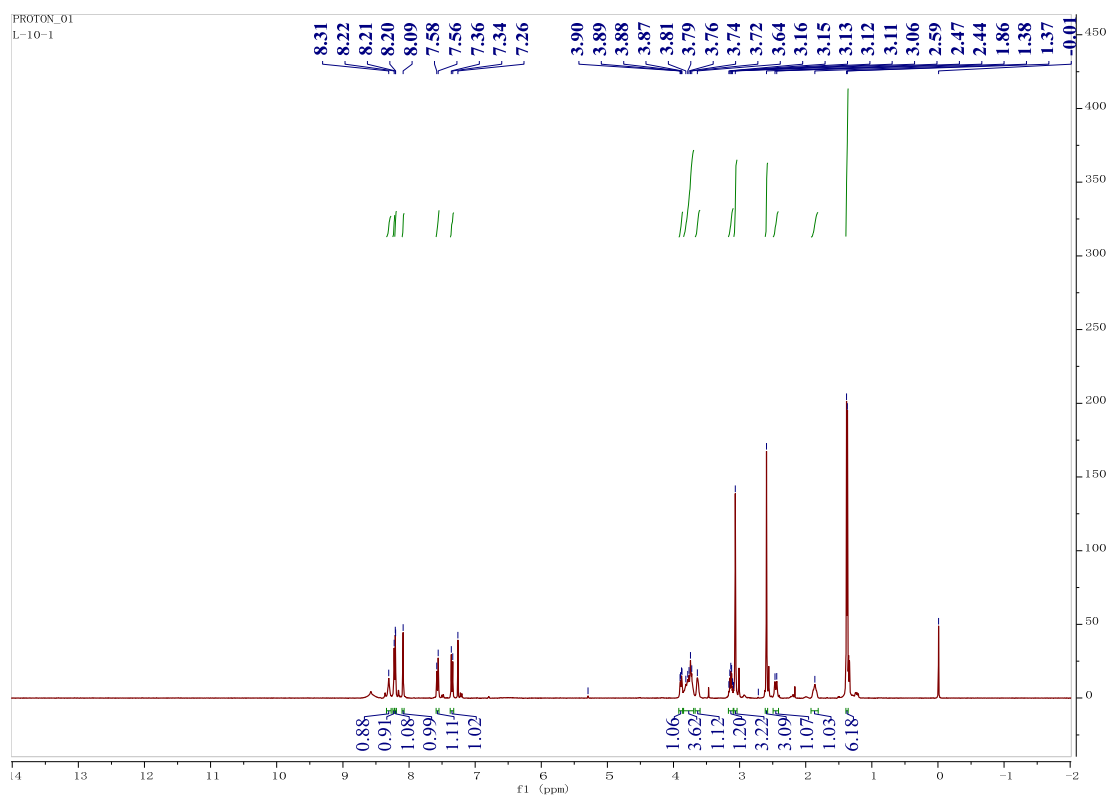

Figure S6: The  $^1\text{H}$ -NMR spectra of **12c**

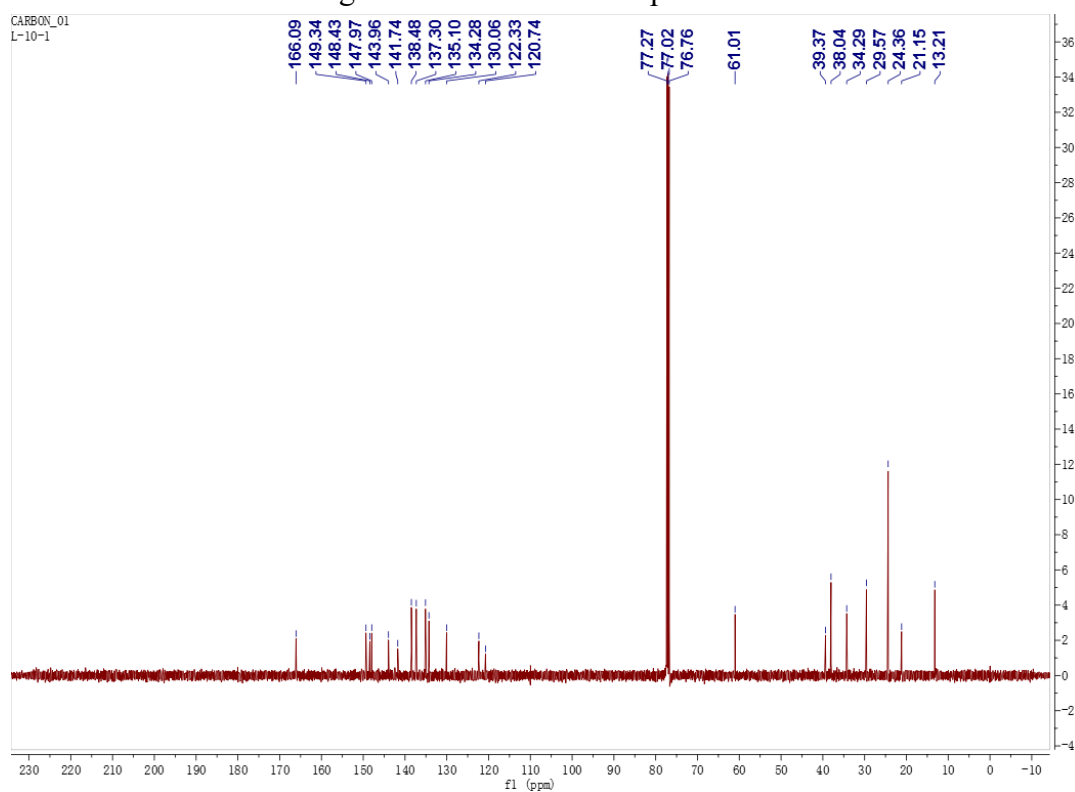

Figure S7: The  $^{13}\text{C}$ -NMR spectra of **12c**

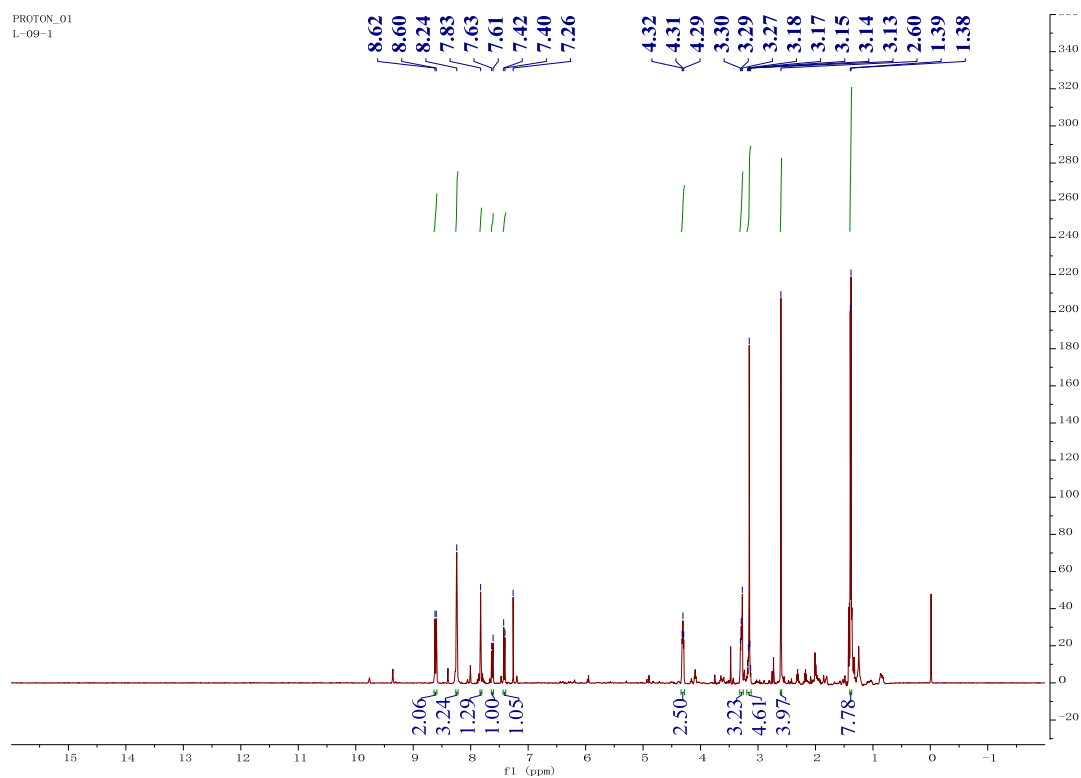

Figure S8: The  $^1\text{H}$ -NMR spectra of **12d**

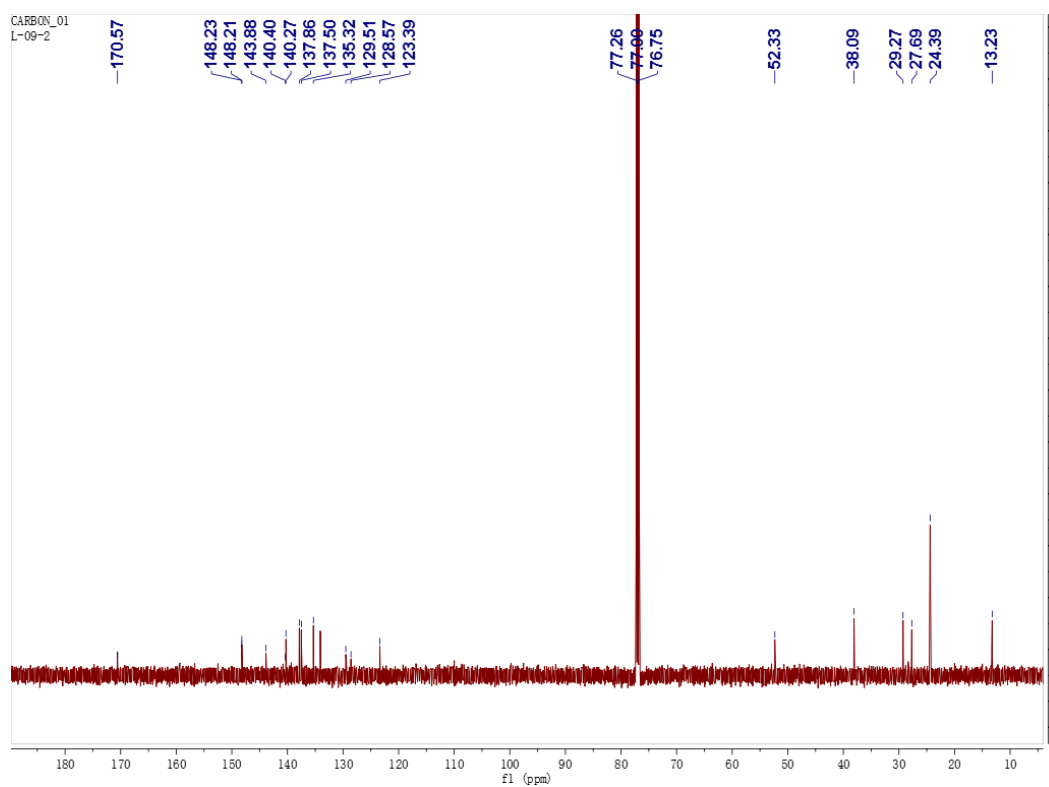

Figure S9: The  $^{13}\text{C}$ -NMR spectra of **12d**

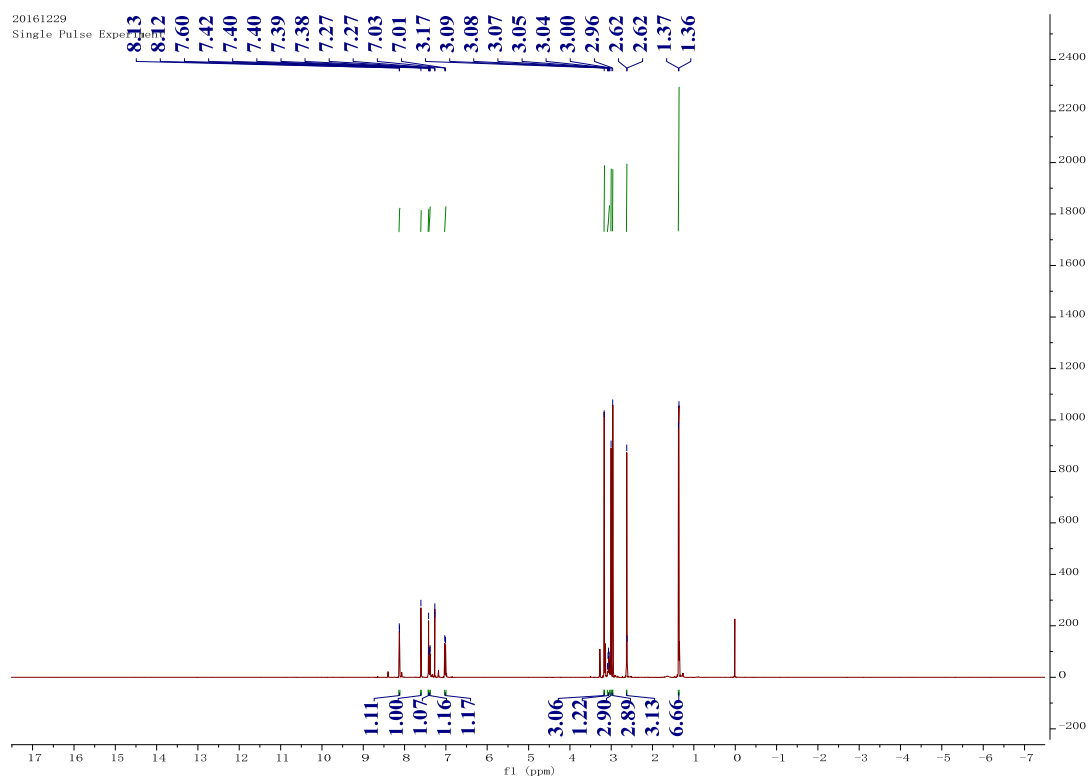

Figure S10: The  $^1\text{H}$ -NMR spectra of **16**

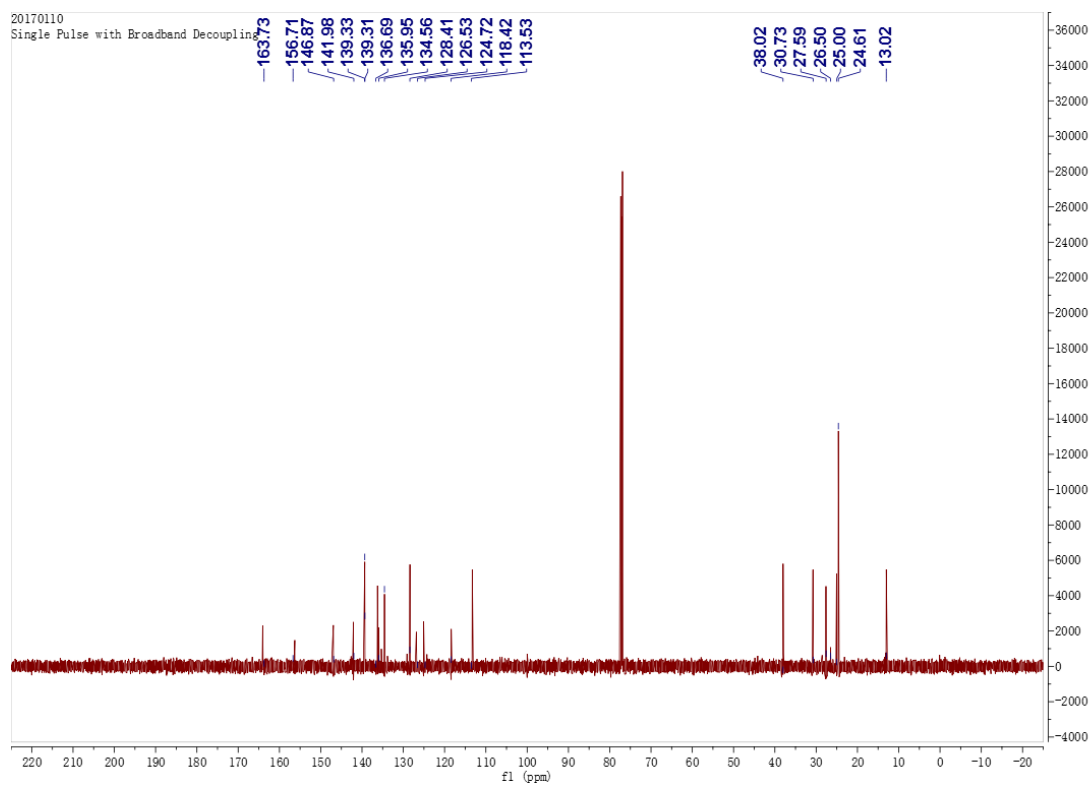

Figure S11: The  $^{13}\text{C}$ -NMR spectra of **16**
